# Supplementary material for: Relationships between the solution and solid-state properties of solution-cast low-k silica thin films
Source: Royal Society of Chemistry journal article supplement (doi:10.1039/c6cp04166c), 2016-01-01
Supplement: c6cp04166c1.pdf [file c6cp04166c1.pdf]

## Supporting Information

### Relationships between solution and solid-state properties of solution-cast low- $k$ silica thin films

Chao-Ching Chiang,<sup>†</sup> Chien-You Su,<sup>‡</sup> An-Chih Yang,<sup>†</sup> Ting-Yu Wang,<sup>§</sup> Wen-Ya Lee,<sup>⊥</sup> Chi-Chung

Hua<sup>\*,‡</sup>, Dun-Yen Kang<sup>\*,†</sup>

<sup>†</sup>Department of Chemical Engineering, National Taiwan University, Taipei 10617, Taiwan, ROC

<sup>‡</sup>Department of Chemical Engineering, National Chung Cheng University, Chia-Yi 62102, Taiwan, ROC

<sup>§</sup>Electron Microscope Unit of Instrument Center, National Taiwan University, Taipei 10617, Taiwan, ROC

<sup>⊥</sup>Department of Chemical Engineering and Biotechnology, National Taipei University of Technology, Taipei 10608, Taiwan, ROC

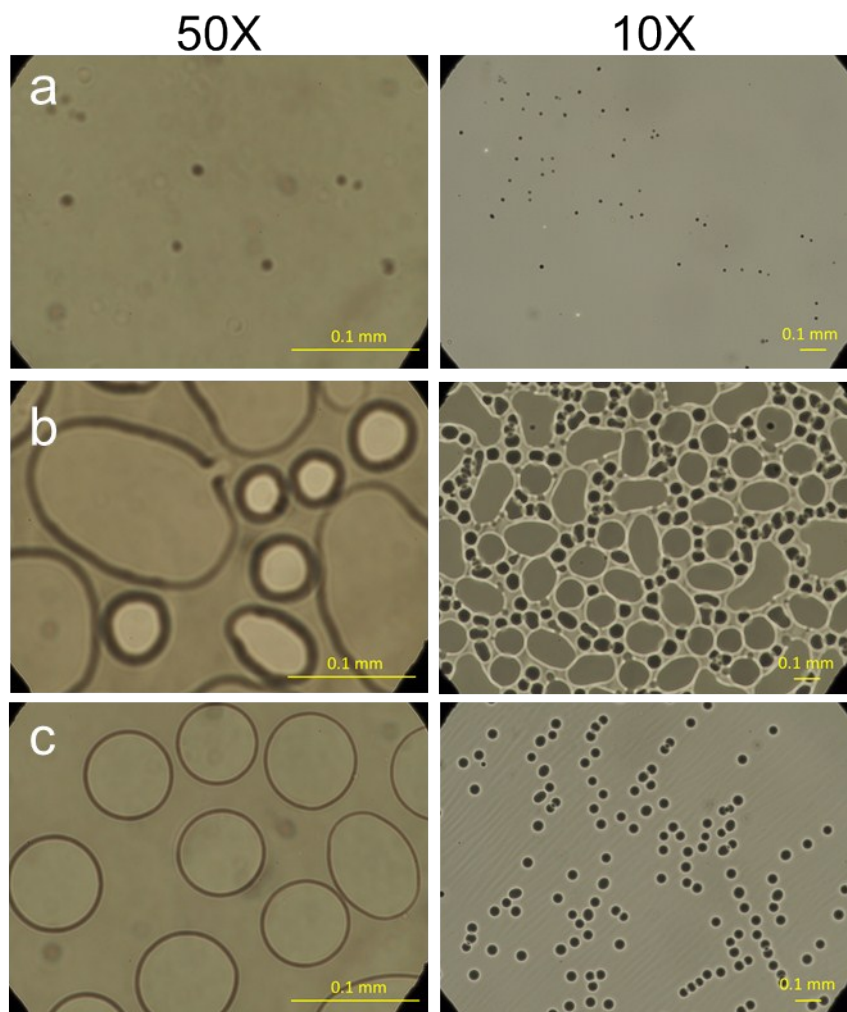

**Fig. S1.** OM images of natural drying, drop-casting thin films produced from the solutions with (a) no surfactant, (b) TWEEN<sup>®</sup> 80, or (c) Triton<sup>™</sup> X-100 as the surfactant.

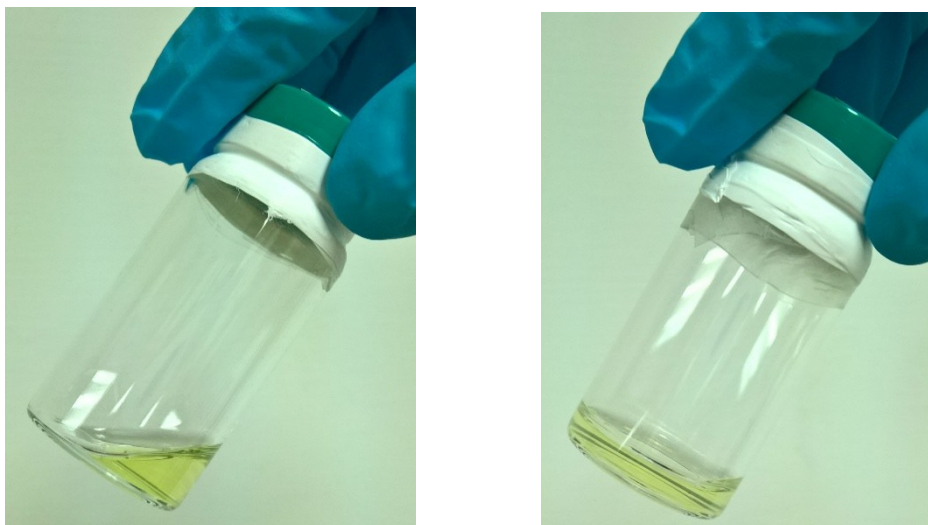

**Fig. S2.** Solution (left) versus gel (right) state produced from silica casting solutions with TWEEN<sup>®</sup> 80 at a surfactant concentration of (a) 20 wt% (the same as used in this work) and (b) 32 wt% after aging for 22 hr at room temperature.

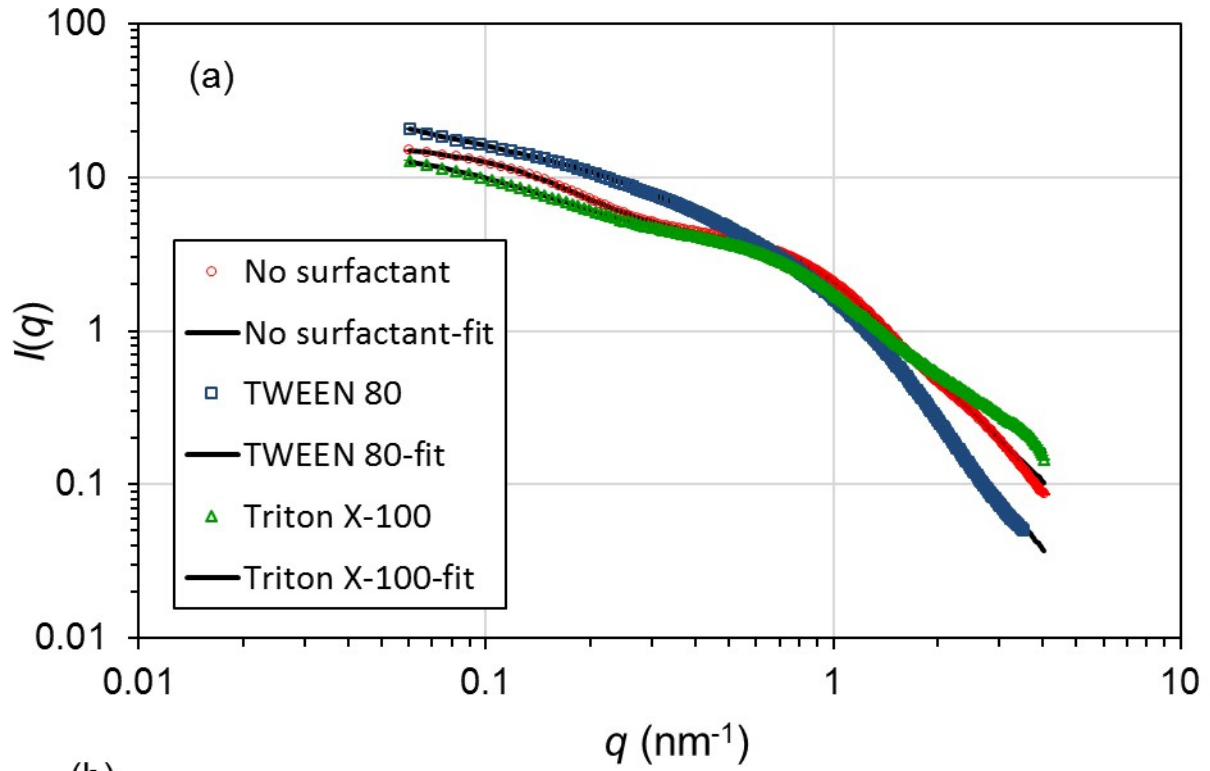

(b)

| Fitted parameters         | G     | $R_g$<br>(nm) | B    | $R_{sub}$<br>(nm) | P   | $G_s$ | $R_s$<br>(nm) | $B_s$ | $P_s$ |
|---------------------------|-------|---------------|------|-------------------|-----|-------|---------------|-------|-------|
| No surfactant             | 8.68  | 14.2          | 0.21 | 13.0              | 1.8 | 8.12  | 4.6           | 2.17  | 2.2   |
| TWEEN <sup>®</sup> 80     | 18.34 | 39.8          | 0.57 | 11.8              | 1.0 | 13.42 | 4.4           | 1.78  | 2.8   |
| Triton <sup>™</sup> X-100 | 7.62  | 20.0          | 0.32 | 9.2               | 1.0 | 7.47  | 5.5           | 1.75  | 1.7   |

(c)

$$I(q) \approx G \exp\left(\frac{-q^2 R_g^2}{3}\right) + B \exp\left(\frac{-q^2 R_{sub}^2}{3}\right) \left[ \frac{\left(\text{erf}(qR_g/\sqrt{6})\right)^3}{q} \right]^P$$

$$+ G_s \exp\left(\frac{-q^2 R_s^2}{3}\right) + B_s \left[ \frac{\left(\text{erf}(qR_s/\sqrt{6})\right)^3}{q} \right]^{P_s}$$

**Fig. S3.** (a) Detailed fitting of full SAXS profiles as shown in **Fig. 5** for three casting solutions, (b)

gathering of the fitted parameters, and (c) the expression utilized for the theoretical fit (G. Beaucage,

in *Polymer Science: A Comprehensive Reference*, ed. M. Möller, Elsevier, Amsterdam, 2012, DOI:

<http://dx.doi.org/10.1016/B978-0-444-53349-4.00032-7>, pp. 399-409).

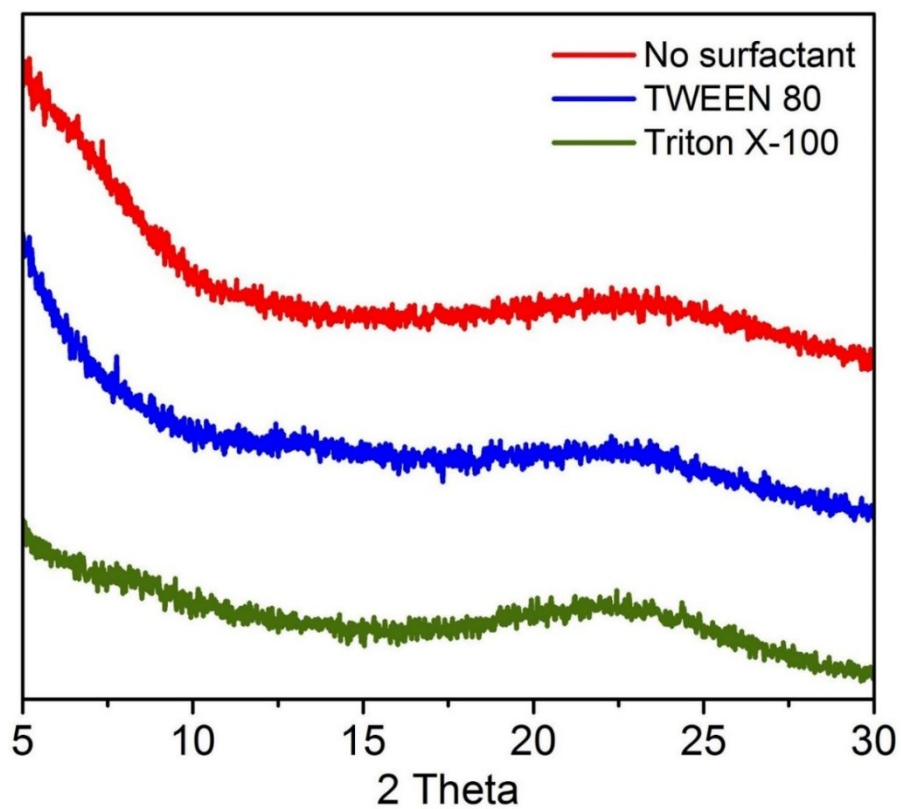

**Fig. S4.** XRD patterns of powder samples derived from colloidal silica solutions without surfactant and with TWEEN<sup>®</sup> 80 or Triton<sup>™</sup> X-100 as the surfactant, respectively.

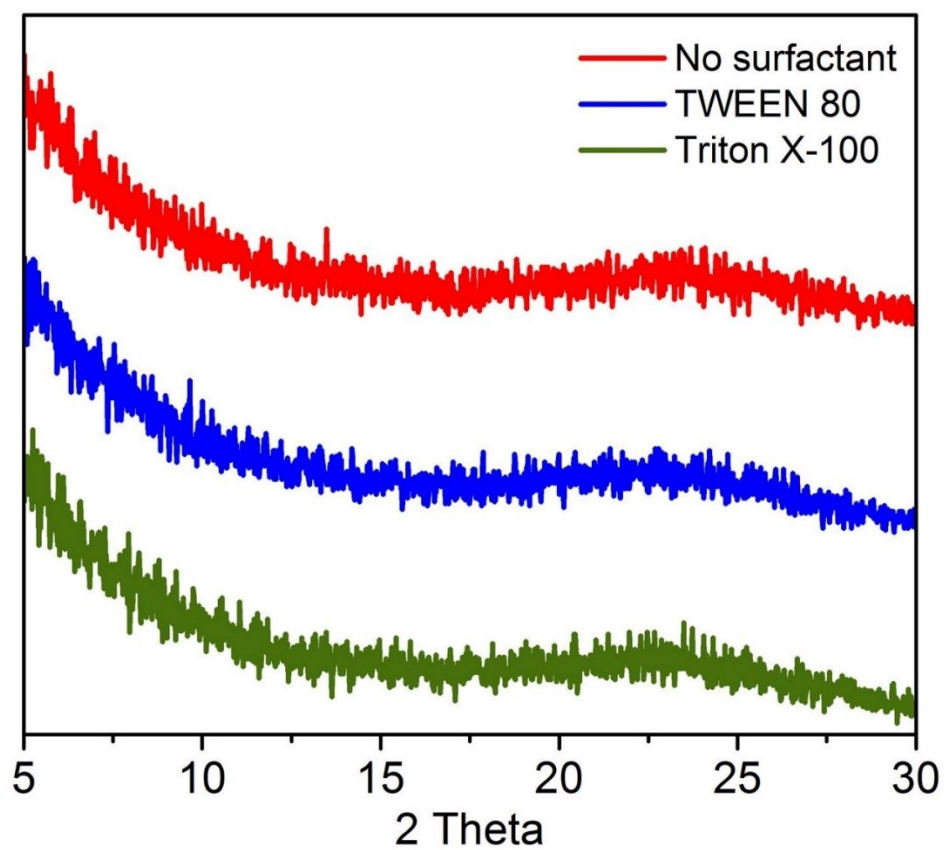

**Fig. S5.** GIXRD patterns of thin films cast from the solutions without surfactant and with TWEEN<sup>®</sup> 80 or Triton<sup>™</sup> X-100 as the surfactant, respectively.
